# Supplementary material for: Inhibition of endothelial Nox2 activation by LMH001 protects mice from angiotensin II-induced vascular oxidative stress, hypertension and aortic aneurysm
Source: PubMed Central journal article supplement — Redox Biol. 2022 Mar 3;51:102269. doi: 10.1016/j.redox.2022.102269 (PMC8908273; doi:10.1016/j.redox.2022.102269), 2022-03-03
Supplement: mmc1.pdf [file mmc1.pdf]

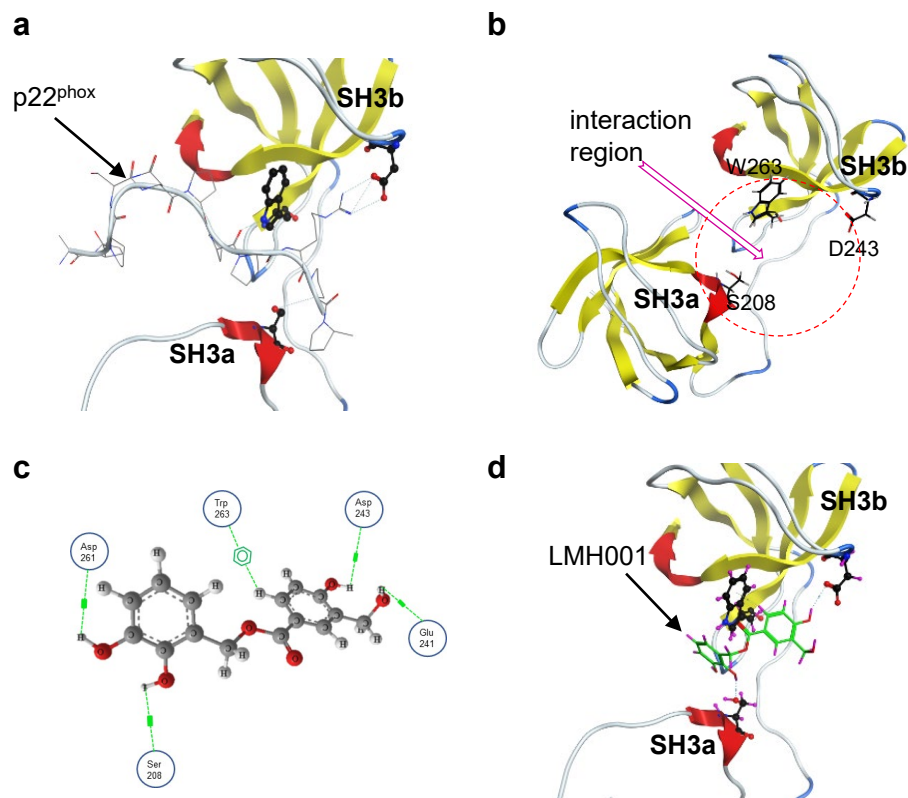

**Supplementary Fig. 1:** Illustration of LMH001 design and inhibition of p47<sup>phox</sup>/p22<sup>phox</sup> interaction.

**a.** Computer model of p22<sup>phox</sup> C-terminal proline rich region (sequence: QPPSNPPPRPP) integration with phosphorylated p47<sup>phox</sup> tandem SH3 domain. **b.** Pharmacophore identified in p47<sup>phox</sup> crystal structure (PDBe 1ov3) for its interaction with p22<sup>phox</sup> (Trp263, Asp243 and Ser208 depicted in black stick format) and used for inhibitor design. **c.** Illustration of LMH001 structure and model interactions (dashed lines) with Ser208, Asp243, Glu 241 and Asp261 (side-chain hydrogen bonding) and with Trp-263 ( $\pi$ - $\pi$  stacking). **d.** Model of LMH001 docked in the p47<sup>phox</sup> SH3 (a and b) binding pocket. Detailed methods of computer modeling and molecular dynamics of p47<sup>phox</sup> phosphorylation and interaction with p22<sup>phox</sup> had been published and referenced in the main text.

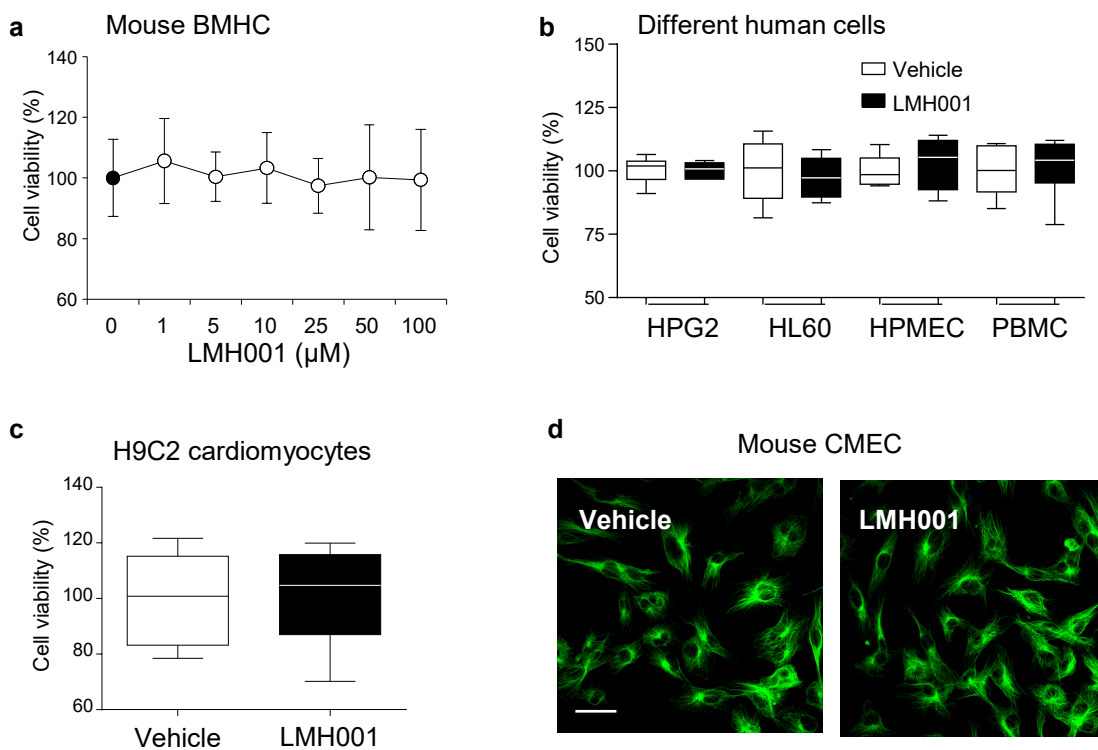

**Supplementary Fig. 2. In vitro tests of LMH001 cytotoxicity.** Cell viability was tested by both MTS and MTT assays with similar results. Data displayed here were from MTS assay and were expressed as % of control (without LMH001). **a.** Primary mouse bone marrow hematopoietic cells (BMHC). LMH001 was added in the culture medium at the dose indicated for 48 h. **b.** Human cell viability. LMH001 (20  $\mu\text{M}$ ) was added in the culture medium for 48 h. HPG2: human liver cell line; HL60: human peripheral leucocyte cell line; HPMEC: human pulmonary microvascular endothelial cell line, PBMC: freshly isolated human peripheral blood mononuclear cells. **c.** Cardiomyocyte viability. H9C2: rat embryoid cardiac myocytes. **d** Morphology and tubulin staining (green) of mouse primary coronary microvascular endothelial cells (CMEC) after 14 d culture with LMH001 (10  $\mu\text{M}$ , refreshed every other day) by immunofluorescence.

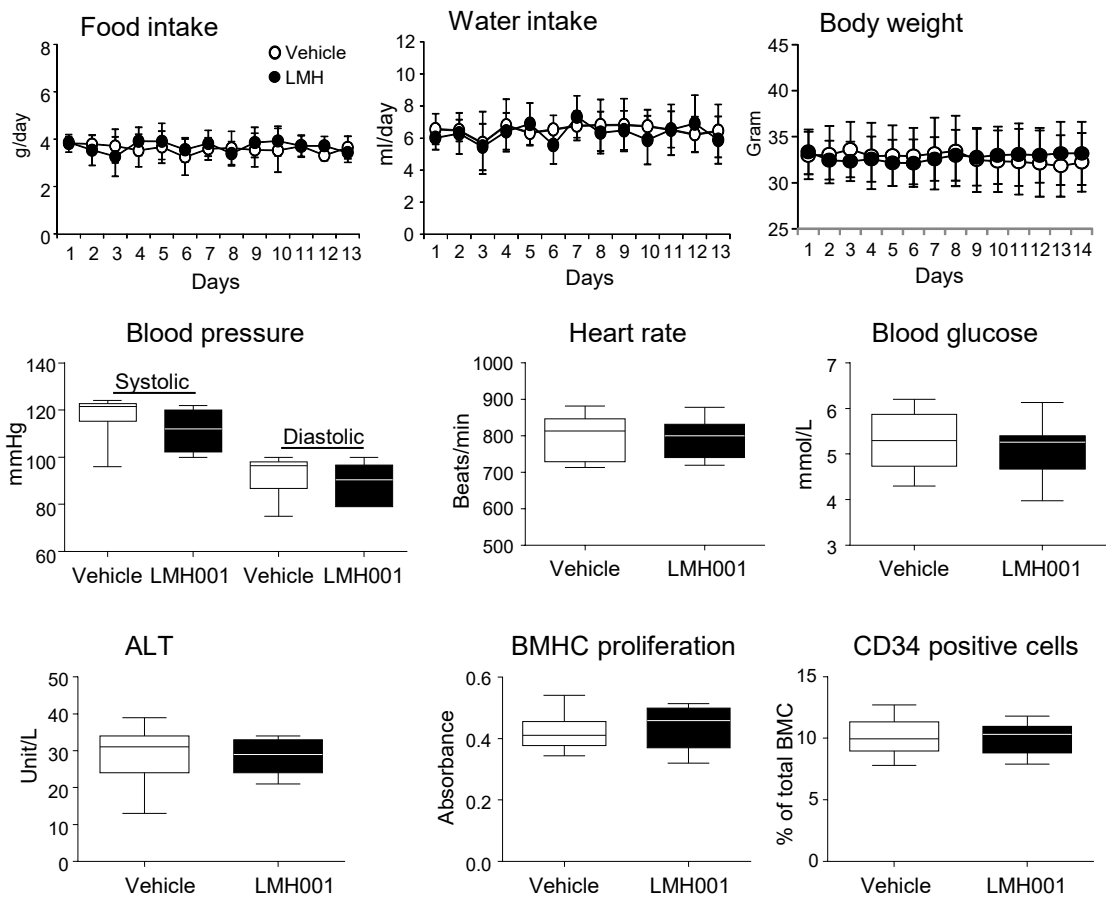

**Supplementary Fig. 3. in vivo test of LMH001 safety.** LMH001 (5 mg/kg/day. once) was injected intraperitoneally for 14 days in mice. The measurements were labelled above the figures. ALT: serum alanine aminotransferase. The bone marrow hemopoietic cells (BMHC) were isolated from these mice and cell proliferation was tested by MTS assay. The % of CD34 (a stem cell marker) positive cells in BMHC was examined by flow cytometry. The results were expressed as % of vehicle injected controls. n=6-8 mice/group.

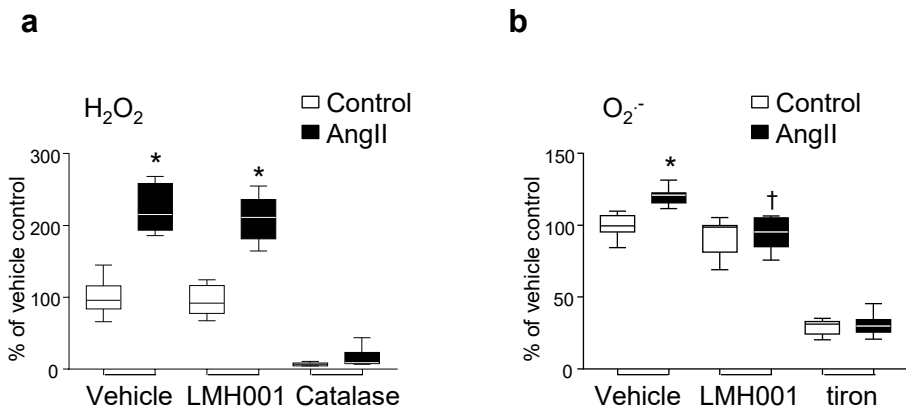

**Supplementary Fig. 4. LMH001 effects on ROS production by primary mouse aortic vascular smooth cells. a.** H<sub>2</sub>O<sub>2</sub> production detected by amplex red assay. **b.** O<sub>2</sub><sup>-</sup> production detected by lucigenin-chemiluminescence. \*P<0.05 for indicated values versus vehicle control (or control) values. †P<0.05 for indicated values versus vehicle AngII (or AngII) values. n=6 independent cell cultures or isolations.

**Supplementary Table 1. Comparison of measurements with or without LMH001 treatment**

| Parameter                | Day  | Saline control group |          |          | AngII 0.8mg/kg/d for 14d |                       |                       |
|--------------------------|------|----------------------|----------|----------|--------------------------|-----------------------|-----------------------|
|                          |      | Vehicle              | LMH      | p47KO    | Vehicle                  | LMH                   | p47KO                 |
| Body Weight (g)          | d 0  | 32.8±1.7             | 32.5±1.4 | 31.9±1.6 | 32.1±2.3                 | 32.1±2.1              | 32.8±1.5              |
|                          | d 14 | 33.6±1.9             | 33.3±1.3 | 32.4±1.5 | 28.1±1.4*†               | 31.2±2.0 <sup>#</sup> | 30.8±1.3 <sup>#</sup> |
| Heart weight (mg)        | d 14 | 149±7.5              | 150±6.5  | 150±5.7  | 174±4.5 <sup>†</sup>     | 152±5.5 <sup>#</sup>  | 159±7.2 <sup>†#</sup> |
| sBP (mm/Hg)              | d0   | 123±3.1              | 120±5.6  | 125±5.6  | 124±7.8                  | 125±8                 | 117±10.8              |
|                          | d14  | 128±6.1              | 124±6.4  | 125±6.3  | 188±9.3*†                | 130±7.5 <sup>#</sup>  | 147±7.0* <sup>#</sup> |
| Glucose (mM)             | d14  | 6.6±1.1              | 6.5±0.5  | 6.7±0.7  | 6.1±0.9                  | 6.2±0.7               | 6.0±0.9               |
| Mice had aortic aneurysm | d14  | 0/12                 | 0/12     | 0/12     | 8/12 <sup>†</sup>        | 1/12 <sup>#</sup>     | 3/12 <sup>#</sup>     |

Results were presented as mean±SD of 12 mice/per group. Two-way ANOVA with Tukey multiple comparison was used for statistics of body weight, heart weight and BP. Fisher's exact test was used for mice with aneurysm. \* P<0.05 for indicated d14 values versus d0 value in the same treatment group; † P<0.05 for indicated AngII values versus saline vehicle values at d14; # P<0.05 for indicated value versus vehicle value under the same dose of AngII treatment.
